# Supplementary material for: Norspermidine Is Not a Self-Produced Trigger for Biofilm Disassembly
Source: PubMed Central journal article supplement (PMC3969229; doi:10.1016/j.cell.2014.01.012), 2014-02-13
Supplement: mmc2.pdf [file mmc2.pdf]

**Table S2. Strains of *B. subtilis* from This Study, Related to Experimental Procedures**

| <b>Strain</b> | <b>Relevant genotype/Description</b>                                         | <b>Source/Construction</b>           |
|---------------|------------------------------------------------------------------------------|--------------------------------------|
| MC1061        | <i>E. coli</i> F' <i>lacI</i> Q <i>lacZ</i> M15 <i>Tn10</i> ( <i>tet</i> )   | <i>E. coli</i> Genetic Stock Center  |
| NCIB3610      | prototroph                                                                   | <i>Bacillus</i> Genetic Stock Center |
| NCIB3610-H    | prototroph                                                                   | Losick Laboratory                    |
| 168           | <i>trpC2</i>                                                                 | <i>Bacillus</i> Genetic Stock Center |
| <i>yaaO</i>   | 168 <i>yaaO::erm</i>                                                         | (Sekowska et al. 1998)               |
| <i>eps</i>    | 3610-H <i>eps(A-O)::tet</i>                                                  | (Branda et al. 2006)                 |
| NRS2450       | 3610 <i>eps(A-O)::tet</i>                                                    | SPP1 <i>eps</i> → NCIB3610           |
| NRS3088       | 3610 <i>yaaO::erm</i>                                                        | SPP1 <i>yaaO</i> → NCIB3610          |
| NRS3089       | 3610 <i>speA::spc</i>                                                        | (Burrell et al. 2010)                |
| NRS3971       | 3610 <i>speA::spc eps(A-O)::tet</i>                                          | SPP1 NRS3089 → NRS2450               |
| NRS3991       | 168 + pNW1111=pMAD- $\Delta$ <i>speD</i>                                     | pNW1111 → 168                        |
| NRS3992       | 168 + pNW1110=pMAD- $\Delta$ <i>gabT</i>                                     | pNW1110 → 168                        |
| NRS3996       | 168 <i>amyE::P<sub>hy-spank</sub>gabT-lacI</i> ( <i>spc</i> )                | pNW1114 → 168                        |
| NRS4005       | 3610 $\Delta$ <i>speD</i>                                                    | SPP1 NRS3991 → NCIB3610              |
| NRS4007       | 3610 $\Delta$ <i>gabT</i>                                                    | SPP1 NRS3992 → NCIB3610              |
| NRS4104       | 3610 $\Delta$ <i>gabT amyE::P<sub>hy-spank</sub>gabT-lacI</i> ( <i>spc</i> ) | SPP1 NRS3996 → NRS4007               |

**Table S3. Plasmids Used in This Study, Related to Experimental Procedures**

| <b>Plasmid</b> | <b>Description</b>                                                | <b>Source</b>                |
|----------------|-------------------------------------------------------------------|------------------------------|
| pUC19          | High copy number cloning vector                                   | (Yanisch-Perron et al. 1985) |
| pMAD           | In-frame markerless deletion plasmid                              | (Arnaud et al. 2004)         |
| pDR111         | <i>B. subtilis</i> integration vector for IPTG-induced expression | (Britton et al. 2002)        |
| pNW1106        | pUC19- $\Delta$ <i>speD</i>                                       | This work                    |
| pNW1107        | pUC19- $\Delta$ <i>gabT</i>                                       | This work                    |
| pNW1110        | pMAD- $\Delta$ <i>gabT</i>                                        | This work                    |
| pNW1111        | pMAD- $\Delta$ <i>speD</i>                                        | This work                    |
| pNW1114        | pDR111- <i>gabT</i> coding region                                 | This work                    |

**Table S4. Oligonucleotide Primers Used in This Study, Related to Experimental Procedures**

| <b>Primer</b>  | <b>Sequence 5'-3'</b>                              | <b>Use</b>                   |
|----------------|----------------------------------------------------|------------------------------|
| <b>NSW1500</b> | GCATGGATCCTTCCAACAACAACAGGAGCG                     | <i>speD</i> deletion cloning |
| <b>NSW1501</b> | CGCAATTTACTTTATAGTACGTCGACAGTCATGGACCCCCC<br>TTAAC | <i>speD</i> deletion cloning |
| <b>NSW1502</b> | GTTAAGGGGGTCCATGACTGTGACGTACTATAAAGTAA<br>ATTGCG   | <i>speD</i> deletion cloning |
| <b>NSW1503</b> | GCATAAGCTTAGATCTCGACTTCGTCAATCTTAGCC               | <i>speD</i> deletion cloning |
| <b>NSW1508</b> | GCATCCCGGGCAGTCAACAGCTGCATGAGC                     | <i>gabT</i> deletion cloning |
| <b>NSW1509</b> | CTTTCCAATGATTAAGCTCGTCTAGAACTCATGTGAATATC<br>CCCCT | <i>gabT</i> deletion cloning |
| <b>NSW1510</b> | AGGGGGATATTCACATGAGTTCTAGACGAGCTTAATCATTG<br>GAAAG | <i>gabT</i> deletion cloning |
| <b>NSW1511</b> | GCATAAGCTTAGATCTTGCTTGTGAACACATTTCCG               | <i>gabT</i> deletion cloning |
| <b>NSW1524</b> | GCATAAGCTTATACCGACAGGGGGATATTCACATGAGTCAA<br>AC    | <i>gabT</i> complementation  |
| <b>NSW1525</b> | GCATGCATGCTTAAGCTCGCAGGCCCGCCTCCAAGATGC            | <i>gabT</i> complementation  |
